# Supplementary material for: Controlling carrier trapping and relaxation with a dipole field in an organic field-effect device
Source: Royal Society of Chemistry journal article supplement (doi:10.1039/c6ra09676j), 2016-01-01
Supplement: c6ra09676j1.pdf [file c6ra09676j1.pdf]

## Supplementary material

### Controlling carriers trapping and relaxation with a dipole field in an organic field-effect device

Yu-Fu Wang,<sup>a</sup> Min-Ruei Tsai,<sup>a</sup> Po-Yang Wang,<sup>b</sup> Chin-Yang Lin,<sup>a</sup> Horng-Long Cheng,<sup>a</sup> Fu-Ching Tang,<sup>c</sup> Steve Lien-Chung Hsu,<sup>d</sup> Jim Hsu<sup>b</sup> and Wei-Yang Chou<sup>\*,a</sup>

<sup>a</sup> Department of Photonics, Advanced Optoelectronic Technology Centre, National Cheng Kung University, Tainan 701, Taiwan. E-mail: weiyang@mail.ncku.edu.tw; Fax: +886 6 2095040; Tel: +886 6 2757575 ext.63912

<sup>b</sup> Polyimide Department, Daxin Materials Corporation, Taichung 407, Taiwan.

<sup>c</sup> Department of Physics, National Cheng Kung University, Tainan 701, Taiwan.

<sup>d</sup> Department of Materials Science and Engineering, National Cheng Kung University, Tainan 701, Taiwan

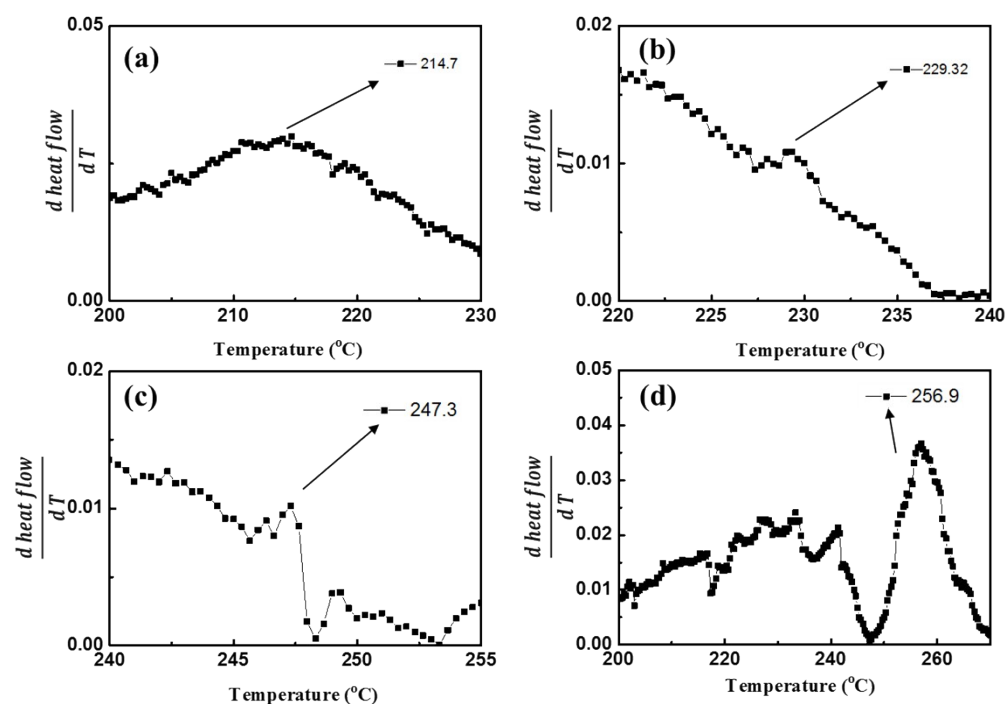

**Figure S1.** The derivative of the heat flux with respect to temperature obtained from the temperature-dependent DSC curves of native PI and PCPI/PI mixed polymers with different weight ratios of PCPIs: (a) 0, (b) 6%, (c) 10%, and (d) 20%.

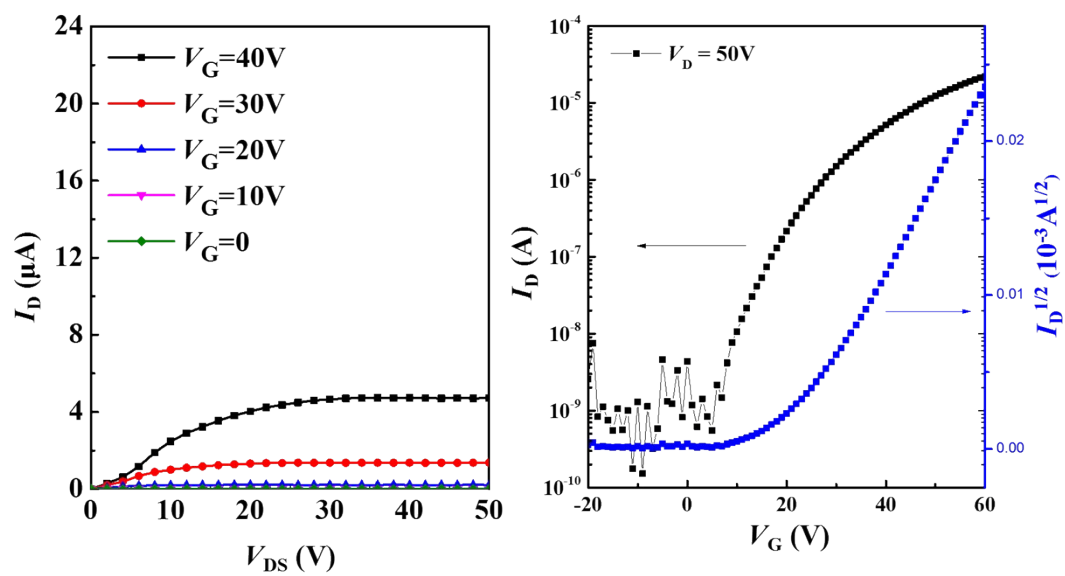

**Figure S2.** The output and transfer characteristics of *n*-type OFET-based memory devices with pure PCPI electret.
